# Supplementary material for: Lysosomal integral membrane protein 2 is a novel component of the cardiac intercalated disc and vital for load-induced cardiac myocyte hypertrophy
Source: PubMed Central journal article supplement — J Exp Med. 2007 May 14;204(5):1227–35. doi: 10.1084/jem.20070145 (PMC2118572; doi:10.1084/jem.20070145), 2007-05-14
Supplement: jexpmed_jem.20070145_7.pdf [file jexpmed_jem.20070145_7.pdf]

**Table S1.** Genes that are differentially expressed in biopsies of failure-prone Ren2 rats as compared to compensated Ren2 rats

| Probe set ID <sup>a</sup> | FC <sup>b</sup><br>(HF/comp) | FC <sup>b</sup><br>(comp/contr) | FC <sup>b</sup><br>(HF/contr) | Ttest <sup>c</sup><br>(HF,comp) | ttest <sup>c</sup><br>(comp,contr) | ttest <sup>c</sup><br>(HF,contr) | Gene name                                                                                                        |
|---------------------------|------------------------------|---------------------------------|-------------------------------|---------------------------------|------------------------------------|----------------------------------|------------------------------------------------------------------------------------------------------------------|
| 1383637_at                | 2.38                         | -3.06                           | -1.29                         | 0.000016                        | 0.000007                           | 0.034115                         | Transcribed sequences                                                                                            |
| 1385381_at                | 2.28                         | -1.91                           | 1.20                          | 0.038761                        | 0.138775                           | 0.658911                         | Transcribed sequences                                                                                            |
| 1390530_at                | 2.07                         | -2.07                           | -1.00                         | 0.025325                        | 0.009386                           | 0.999806                         | Transcribed sequences                                                                                            |
| 1391387_s_at              | 2.00                         | -3.55                           | -1.77                         | 0.045059                        | 0.000006                           | 0.027763                         | Transcribed sequences                                                                                            |
| 1394011_at                | 1.92                         | -1.59                           | 1.21                          | 0.023178                        | 0.017873                           | 0.464874                         | Transcribed sequences                                                                                            |
| 1378315_at                | 1.91                         | -2.81                           | -1.47                         | 0.018390                        | 0.000572                           | 0.141974                         | Transcribed sequence with moderate similarity to protein pdb:1LBG (E. coli) B Chain B, Lactose Operon Repressor  |
| 1395036_at                | 1.83                         | -1.62                           | 1.13                          | 0.005896                        | 0.023006                           | 0.262097                         | Similar to Ac2-190 (LOC312952), mRNA                                                                             |
| 1379740_at                | 1.82                         | -1.32                           | 1.38                          | 0.025179                        | 0.090286                           | 0.191486                         | Transcribed sequences                                                                                            |
| 1379345_at                | 1.80                         | -1.68                           | 1.07                          | 0.017815                        | 0.018960                           | 0.664513                         | Similar to type XV collagen (LOC298069), mRNA                                                                    |
| 1394419_at                | 1.73                         | -1.17                           | 1.48                          | 0.013232                        | 0.391831                           | 0.066245                         | Similar to RIKEN cDNA 6530401L14 gene (LOC296060), mRNA                                                          |
| 1398706_at                | 1.69                         | -1.13                           | 1.49                          | 0.012983                        | 0.308701                           | 0.061366                         | Transcribed sequence with moderate similarity to protein pdb:1LBG (E. coli) B Chain B, Lactose Operon Repressor  |
| 1374029_at                | 1.67                         | -1.06                           | 1.58                          | 0.005357                        | 0.567933                           | 0.031042                         | Transcribed sequences                                                                                            |
| 1368429_at                | 1.66                         | -1.66                           | -1.00                         | 0.000959                        | 0.048662                           | 0.997913                         | TAF9-like RNA polymerase II, TATA box binding protein (TBP)-associated factor, 31 kD                             |
| 1398587_at                | 1.66                         | -1.83                           | -1.10                         | 0.011620                        | 0.014845                           | 0.557088                         | Transcribed sequences                                                                                            |
| 1388527_at                | 1.66                         | -1.25                           | 1.33                          | 0.037074                        | 0.190260                           | 0.204989                         | Transcribed sequences                                                                                            |
| 1392795_at                | 1.65                         | -1.18                           | 1.40                          | 0.003974                        | 0.452570                           | 0.155797                         | Transcribed sequences                                                                                            |
| 1373697_at                | 1.65                         | 2.16                            | 3.57                          | 0.010724                        | 0.001765                           | 0.001148                         | Similar to Myosin binding protein C, fast-type (LOC292879), mRNA                                                 |
| 1384899_at                | 1.65                         | -1.63                           | 1.01                          | 0.020374                        | 0.020346                           | 0.934120                         | Transcribed sequences                                                                                            |
| 1378614_at                | 1.64                         | -1.09                           | 1.51                          | 0.009899                        | 0.717726                           | 0.094550                         | Transcribed sequences                                                                                            |
| 1376964_at                | 1.63                         | -1.20                           | 1.36                          | 0.005509                        | 0.177978                           | 0.032373                         | Similar to Ofd1 protein (LOC302661), mRNA                                                                        |
| 1379130_at                | 1.63                         | 1.12                            | 1.83                          | 0.022482                        | 0.603545                           | 0.025922                         | Transcribed sequences                                                                                            |
| 1397889_at                | 1.63                         | 1.01                            | 1.64                          | 0.032654                        | 0.974625                           | 0.081607                         | Transcribed sequences                                                                                            |
| 1388904_at                | 1.62                         | -2.00                           | -1.24                         | 0.006148                        | 0.000430                           | 0.012235                         | hypothetical protein                                                                                             |
| 1381556_at                | 1.62                         | -1.92                           | -1.19                         | 0.043902                        | 0.004195                           | 0.439074                         | Transcribed sequences                                                                                            |
| 1367744_at                | 1.61                         | -1.54                           | 1.05                          | 0.006968                        | 0.019714                           | 0.724155                         | melanoma antigen, family D, 2                                                                                    |
| 1378937_at                | 1.60                         | -1.38                           | 1.16                          | 0.038643                        | 0.048431                           | 0.407622                         | Transcribed sequences                                                                                            |
| 1382183_at                | 1.59                         | -1.37                           | 1.16                          | 0.003473                        | 0.002520                           | 0.257826                         | Transcribed sequences                                                                                            |
| 1369203_at                | 1.58                         | -1.06                           | 1.49                          | 0.046910                        | 0.789679                           | 0.124743                         | Wnt inhibitory factor 1                                                                                          |
| 1389979_at                | 1.57                         | -1.08                           | 1.45                          | 0.008233                        | 0.664369                           | 0.166651                         | Similar to transportin-SR; importin 12 (LOC296954), mRNA                                                         |
| 1385326_at                | 1.55                         | -1.30                           | 1.19                          | 0.009515                        | 0.143862                           | 0.192234                         | Similar to 60S RIBOSOMAL PROTEIN L29 (P23) (LOC305052), mRNA                                                     |
| 1397676_at                | 1.53                         | -1.75                           | -1.14                         | 0.021689                        | 0.001925                           | 0.495306                         | Transcribed sequences                                                                                            |
| 1377342_s_at              | 1.52                         | 1.03                            | 1.57                          | 0.002968                        | 0.811404                           | 0.013940                         | rapostlin                                                                                                        |
| 1386989_at                | 1.52                         | -2.23                           | -1.47                         | 0.048220                        | 0.000377                           | 0.033489                         | endothelial differentiation, sphingolipid G-protein-coupled receptor, 5                                          |
| 1376704_a_at              | 1.51                         | -1.54                           | -1.02                         | 0.020797                        | 0.015053                           | 0.873952                         | Similar to mage-g1 (LOC309259), mRNA                                                                             |
| 1368553_at                | 1.50                         | -1.35                           | 1.11                          | 0.001911                        | 0.148546                           | 0.590619                         | activin A receptor type II-like 1                                                                                |
| 1392578_at                | 1.50                         | -1.19                           | 1.26                          | 0.019991                        | 0.281248                           | 0.209915                         | matrix Gla protein                                                                                               |
| 1384147_at                | 1.49                         | -1.35                           | 1.11                          | 0.011960                        | 0.001260                           | 0.486286                         | Similar to eIF-1A (LOC317163), mRNA                                                                              |
| 1386156_at                | 1.49                         | -1.76                           | -1.18                         | 0.025787                        | 0.006253                           | 0.294632                         | Transcribed sequences                                                                                            |
| 1371566_at                | 1.48                         | 1.81                            | 2.68                          | 0.014288                        | 0.001446                           | 0.003009                         | Similar to F-box protein FBL2 (LOC363083), mRNA                                                                  |
| 1392516_a_at              | 1.48                         | -1.20                           | 1.24                          | 0.026032                        | 0.252736                           | 0.076396                         | Transcribed sequence with moderate similarity to protein sp:P00722 (E. coli) BGAL_ECOLI Beta-galactosidase       |
| 1373864_at                | 1.48                         | -1.37                           | 1.08                          | 0.027008                        | 0.076428                           | 0.694600                         | Similar to Traf2 and NCK interacting kinase, splice variant 4 (LOC301363), mRNA                                  |
| 1392778_at                | 1.48                         | -3.73                           | -2.51                         | 0.048926                        | 0.005024                           | 0.047714                         | Transcribed sequences                                                                                            |
| 1382598_at                | 1.47                         | -1.55                           | -1.05                         | 0.000125                        | 0.000028                           | 0.276510                         | heat shock factor 2                                                                                              |
| 1392702_at                | 1.47                         | -1.23                           | 1.19                          | 0.001133                        | 0.048095                           | 0.014768                         | Transcribed sequence with weak similarity to protein sp:P16415 (H.sapiens) ZF36_HUMAN Zinc finger protein ZFP-36 |
| 1378637_at                | 1.47                         | -1.27                           | 1.16                          | 0.015599                        | 0.162289                           | 0.423729                         | Transcribed sequences                                                                                            |
| 1398479_at                | 1.47                         | -2.43                           | -1.66                         | 0.018770                        | 0.000004                           | 0.002911                         | Transcribed sequence with strong similarity to protein sp:Q15413 (H.sapiens) RYR3_HUMAN Ryanodine receptor 3     |
| 1384824_at                | 1.47                         | -1.55                           | -1.05                         | 0.019924                        | 0.053908                           | 0.788114                         | Transcribed sequences                                                                                            |
| 1376034_at                | 1.47                         | -1.08                           | 1.36                          | 0.031931                        | 0.582794                           | 0.106602                         | Transcribed sequence with strong similarity to protein ref:NP_055534.1 (H.sapiens)                               |
| 1384000_at                | 1.46                         | -1.09                           | 1.34                          | 0.021094                        | 0.527076                           | 0.135644                         | Similar to sox-4 protein - mouse (LOC364712), mRNA                                                               |
| 1396028_at                | 1.46                         | 1.00                            | 1.47                          | 0.047853                        | 0.986617                           | 0.053122                         | Transcribed sequences                                                                                            |
| 1368370_at                | 1.45                         | -1.11                           | 1.31                          | 0.010093                        | 0.510775                           | 0.141433                         | adenylyl cyclase 4                                                                                               |
| 1398355_at                | 1.45                         | -1.30                           | 1.12                          | 0.016380                        | 0.000193                           | 0.442462                         | transient receptor potential-related protein, ChaK                                                               |
| 1394605_at                | 1.45                         | -1.34                           | 1.09                          | 0.021277                        | 0.069657                           | 0.566168                         | Transcribed sequence with moderate similarity to protein pdb:1LBG (E. coli) B Chain B, Lactose Operon Repressor  |
| 1380393_at                | 1.45                         | -2.72                           | -1.88                         | 0.021715                        | 0.000105                           | 0.002444                         | Similar to crystallin, zeta (LOC362061), mRNA                                                                    |
| 1368990_at                | 1.44                         | -1.13                           | 1.27                          | 0.023593                        | 0.252290                           | 0.213999                         | cytochrome P450, subfamily 1B, polypeptide 1                                                                     |
| 1379866_at                | 1.44                         | -1.66                           | -1.15                         | 0.049391                        | 0.008213                           | 0.458497                         | Transcribed sequences                                                                                            |
| 1377669_at                | 1.43                         | -1.85                           | -1.29                         | 0.045170                        | 0.000937                           | 0.020055                         | low Mr GTP-binding protein                                                                                       |
| 1370866_at                | 1.42                         | -1.54                           | -1.09                         | 0.009390                        | 0.000136                           | 0.405982                         | ribosomal protein L41                                                                                            |
| 1369144_a_at              | 1.42                         | -1.05                           | 1.35                          | 0.011685                        | 0.725768                           | 0.085181                         | potassium voltage gated channel, Shal-related family, member 3                                                   |
| 1383154_at                | 1.42                         | -1.17                           | 1.21                          | 0.015048                        | 0.086950                           | 0.181894                         | Similar to SWI/SNF-related matrix-associated actin-dependent regulator of chromatin c2 isoform a                 |
| 1383730_at                | 1.42                         | -1.05                           | 1.35                          | 0.038985                        | 0.744846                           | 0.151871                         | Similar to hypothetical protein (LOC309196), mRNA                                                                |
| 1373077_at                | 1.41                         | -1.10                           | 1.28                          | 0.010766                        | 0.246646                           | 0.075495                         | Similar to hypothetical protein D11Erd497e (LOC287278), mRNA                                                     |
| 1370397_at                | 1.41                         | -1.29                           | 1.09                          | 0.049573                        | 0.113588                           | 0.667928                         | cytochrome P450, family 4, subfamily a, polypeptide 3                                                            |
| 1368356_a_at              | 1.40                         | -1.47                           | -1.05                         | 0.016812                        | 0.025585                           | 0.678705                         | leucyl-specific aminopeptidase PILS                                                                              |
| 1384112_at                | 1.40                         | -1.13                           | 1.23                          | 0.037457                        | 0.091115                           | 0.224045                         | 5 nucleotidase                                                                                                   |
| 1373263_at                | 1.39                         | -1.46                           | -1.05                         | 0.019257                        | 0.021054                           | 0.661030                         | Similar to RIKEN cDNA 5730436H21 (LOC309192), mRNA                                                               |
| 1392422_at                | 1.39                         | -1.35                           | 1.03                          | 0.020023                        | 0.026127                           | 0.780475                         | Similar to Disrupted in bipolar disorder 1 homolog (LOC367083), mRNA                                             |

|                   |             |             |             |                 |                 |                 |                                                                                                                                                             |
|-------------------|-------------|-------------|-------------|-----------------|-----------------|-----------------|-------------------------------------------------------------------------------------------------------------------------------------------------------------|
| 1389074_at        | 1.38        | -1.22       | 1.13        | 0.000261        | 0.186895        | 0.395762        | Similar to mKIAA0769 protein (LOC308864), mRNA                                                                                                              |
| 1375358_at        | 1.38        | -1.45       | -1.05       | 0.005373        | 0.008663        | 0.671917        | Transcribed sequence with moderate similarity to protein pdb:1LBG (E. coli) B Chain B, Lactose Operon Repressor                                             |
| 1389203_at        | 1.38        | 1.10        | 1.52        | 0.011345        | 0.354287        | 0.019944        | Similar to cDNA sequence BC003251 (LOC363604), mRNA                                                                                                         |
| 1372789_at        | 1.37        | -1.46       | -1.07       | 0.005190        | 0.007791        | 0.584783        | zinc finger protein 1                                                                                                                                       |
| 1373673_at        | 1.37        | -1.06       | 1.29        | 0.020481        | 0.622614        | 0.108849        | Transcribed sequence with moderate similarity to protein sp:P01903 (H.sapiens) HA2R_HUMAN HLA class II histocompatibility antigen, DR alpha chain precursor |
| 1388618_at        | 1.37        | -1.35       | 1.02        | 0.023760        | 0.110108        | 0.902310        | Similar to Nidogen 2 (LOC302248), mRNA                                                                                                                      |
| 1384453_at        | 1.37        | 1.03        | 1.41        | 0.023991        | 0.859288        | 0.026672        | Transcribed sequences                                                                                                                                       |
| 1393361_at        | 1.37        | -1.15       | 1.20        | 0.036569        | 0.377803        | 0.064446        | Similar to chromosome 16 open reading frame 33; minus -99 protein (LOC287170), mRNA                                                                         |
| 1376213_at        | 1.37        | -1.15       | 1.19        | 0.040025        | 0.369804        | 0.342365        | Transcribed sequences                                                                                                                                       |
| 1397750_at        | 1.36        | -1.70       | -1.24       | 0.002114        | 0.010715        | 0.273616        | Transcribed sequence with moderate similarity to protein pdb:1LBG (E. coli) B Chain B, Lactose Operon Repressor                                             |
| 1368323_at        | 1.36        | -1.48       | -1.09       | 0.005690        | 0.002562        | 0.314936        | tissue factor pathway inhibitor                                                                                                                             |
| 1379431_at        | 1.36        | -1.26       | 1.08        | 0.010603        | 0.074062        | 0.502835        | Transcribed sequences                                                                                                                                       |
| 1393251_at        | 1.36        | -1.24       | 1.09        | 0.028133        | 0.138487        | 0.452779        | Transcribed sequence with moderate similarity to protein sp:P00722 (E. coli) BGAL_ECOLI Beta-galactosidase                                                  |
| 1387195_at        | 1.36        | -1.53       | -1.13       | 0.037324        | 0.007647        | 0.231288        | suppression of tumorigenicity 14                                                                                                                            |
| <b>1395327_at</b> | <b>1.35</b> | <b>2.17</b> | <b>2.94</b> | <b>0.011445</b> | <b>0.000090</b> | <b>0.000516</b> | <b>Lysosomal integral membrane protein-2</b>                                                                                                                |
| 1372476_at        | 1.35        | 1.32        | 1.79        | 0.011648        | 0.001426        | 0.002928        | putative fatty acid desaturase                                                                                                                              |
| 1390885_at        | 1.35        | -1.33       | 1.01        | 0.013787        | 0.080336        | 0.903876        | Transcribed sequences                                                                                                                                       |
| 1378094_at        | 1.35        | 1.23        | 1.65        | 0.013973        | 0.116445        | 0.000014        | Similar to RIKEN cDNA C820004H04 (LOC360713), mRNA                                                                                                          |
| 1375573_at        | 1.35        | 1.21        | 1.64        | 0.018458        | 0.089383        | 0.003872        | Transcribed sequences                                                                                                                                       |
| 1372237_at        | 1.35        | -2.05       | -1.51       | 0.024551        | 0.000812        | 0.016987        | Transcribed sequences                                                                                                                                       |
| 1379296_at        | 1.35        | -1.50       | -1.11       | 0.034045        | 0.004441        | 0.414585        | Transcribed sequences                                                                                                                                       |
| 1371166_at        | 1.34        | 1.11        | 1.49        | 0.003104        | 0.096521        | 0.003422        | nitric oxide synthase 3, endothelial cell                                                                                                                   |
| 1378842_at        | 1.34        | 1.07        | 1.43        | 0.015999        | 0.653300        | 0.027479        | Similar to gamma-aminobutyric acid (GABA(A)) receptor-associated protein-like 1; GABA(A) receptor-associated protein like 1 (LOC297644), mRNA               |
| 1368712_at        | 1.34        | -1.57       | -1.18       | 0.019867        | 0.000250        | 0.223913        | zinc finger protein 386 (Kruppel-like)                                                                                                                      |
| 1374546_at        | 1.34        | -1.37       | -1.02       | 0.023989        | 0.059455        | 0.871380        | Transcribed sequences                                                                                                                                       |
| 1389353_at        | 1.34        | -1.17       | 1.15        | 0.025431        | 0.272603        | 0.222666        | Transcribed sequences                                                                                                                                       |
| 1385553_at        | 1.34        | 1.00        | 1.35        | 0.028651        | 0.983207        | 0.050788        | Similar to KIAA2010 protein (LOC314388), mRNA                                                                                                               |
| 1377723_at        | 1.34        | -1.86       | -1.39       | 0.031103        | 0.000070        | 0.036944        | Transcribed sequences                                                                                                                                       |
| 1374247_at        | 1.33        | -1.06       | 1.25        | 0.004181        | 0.578495        | 0.135708        | Similar to stabilin-1 (LOC290559), mRNA                                                                                                                     |
| 1393694_at        | 1.33        | -1.42       | -1.06       | 0.014451        | 0.015288        | 0.480561        | Transcribed sequences                                                                                                                                       |
| 1398455_at        | 1.33        | -1.01       | 1.32        | 0.028137        | 0.906149        | 0.069972        | Similar to putative NFkB activating protein (LOC365252), mRNA                                                                                               |
| 1381279_at        | 1.33        | -1.29       | 1.03        | 0.039071        | 0.022327        | 0.814412        | Similar to receptor-interacting protein 2 (LOC362491), mRNA                                                                                                 |
| 1383599_at        | 1.33        | -1.48       | -1.11       | 0.045720        | 0.000251        | 0.442543        | Similar to retinoblastoma-binding protein mRbAp48 (LOC313048), mRNA                                                                                         |
| 1387887_at        | 1.33        | -1.30       | 1.02        | 0.046774        | 0.062744        | 0.891164        | ribosomal protein L14                                                                                                                                       |
| 1367715_at        | 1.33        | 1.48        | 1.96        | 0.046931        | 0.027744        | 0.001522        | tumor necrosis factor receptor superfamily, member 1a                                                                                                       |
| 1371295_at        | 1.33        | -1.32       | 1.01        | 0.047771        | 0.053393        | 0.957744        | Similar to 40S ribosomal protein S20 (LOC367130), mRNA                                                                                                      |
| 1379251_at        | 1.32        | -1.34       | -1.01       | 0.021646        | 0.022239        | 0.904436        | Transcribed sequences                                                                                                                                       |
| 1385798_at        | 1.32        | -2.17       | -1.65       | 0.032402        | 0.000093        | 0.000961        | Transcribed sequences                                                                                                                                       |
| 1369633_at        | 1.32        | -1.83       | -1.39       | 0.040950        | 0.000016        | 0.031232        | chemokine (C-X-C motif) ligand 12                                                                                                                           |
| 1379258_at        | 1.31        | -1.29       | 1.02        | 0.003568        | 0.027712        | 0.880455        | Similar to KLHL5 protein (LOC305351), mRNA                                                                                                                  |
| 1389214_at        | 1.31        | -1.13       | 1.17        | 0.016042        | 0.259998        | 0.031816        | Similar to Lama4 protein (LOC309816), mRNA                                                                                                                  |
| 1381612_at        | 1.31        | -1.25       | 1.05        | 0.016541        | 0.050870        | 0.630886        | Transcribed sequences                                                                                                                                       |
| 1393613_at        | 1.31        | -1.10       | 1.19        | 0.019765        | 0.575825        | 0.348615        | Transcribed sequences                                                                                                                                       |
| 1383011_at        | 1.31        | -1.46       | -1.12       | 0.029704        | 0.000725        | 0.296630        | Transcribed sequence with moderate similarity to protein ref:NP_114414.1 (H.sapiens) CDA02 protein [Homo sapiens]                                           |
| 1380190_at        | 1.31        | 1.03        | 1.35        | 0.045659        | 0.851562        | 0.127638        | coagulation factor VIII                                                                                                                                     |
| 1393309_at        | 1.31        | -1.15       | 1.14        | 0.047422        | 0.142669        | 0.358057        | Transcribed sequences                                                                                                                                       |
| 1389569_at        | 1.30        | -1.27       | 1.03        | 0.003310        | 0.006347        | 0.750814        | Similar to BRIX (LOC294799), mRNA                                                                                                                           |
| 1383147_at        | 1.30        | -1.46       | -1.12       | 0.007386        | 0.001946        | 0.228673        | Transcribed sequences                                                                                                                                       |
| 1398454_at        | 1.30        | -1.15       | 1.13        | 0.010322        | 0.205374        | 0.201145        | Transcribed sequences                                                                                                                                       |
| 1388393_at        | 1.30        | -1.00       | 1.29        | 0.038651        | 0.964748        | 0.037263        | proteolipid protein 2                                                                                                                                       |
| 1395978_at        | 1.30        | -1.31       | -1.01       | 0.048396        | 0.030554        | 0.946955        | Transcribed sequences                                                                                                                                       |
| 1371958_at        | -1.30       | 1.26        | -1.03       | 0.026599        | 0.105909        | 0.888711        | Similar to polymyositis scleroderma overlap syndrome (PM-SCL) antigen 1 a (LOC294975), mRNA                                                                 |
| 1369084_a_at      | -1.30       | 1.35        | 1.03        | 0.029031        | 0.001318        | 0.811259        | Bcl-2-related ovarian killer protein                                                                                                                        |
| 1389230_at        | -1.30       | -2.35       | -3.07       | 0.033563        | 0.000232        | 0.001053        | Similar to hypothetical protein CLONE24945 (LOC309945), mRNA                                                                                                |
| 1374495_at        | -1.31       | 1.46        | 1.12        | 0.001661        | 0.003671        | 0.409206        | Similar to LBA (LOC310700), mRNA                                                                                                                            |
| 1379754_at        | -1.31       | 1.89        | 1.44        | 0.009238        | 0.000038        | 0.012183        | Transcribed sequences                                                                                                                                       |
| 1385016_at        | -1.31       | 1.27        | -1.03       | 0.022694        | 0.066800        | 0.853863        | Transcribed sequences                                                                                                                                       |
| 1393146_at        | -1.31       | 1.06        | -1.23       | 0.031971        | 0.536894        | 0.133001        | Transcribed sequences                                                                                                                                       |
| 1379628_at        | -1.31       | -1.25       | -1.65       | 0.038042        | 0.023836        | 0.000323        | Transcribed sequences                                                                                                                                       |
| 1389516_at        | -1.31       | 1.32        | 1.01        | 0.039329        | 0.067901        | 0.950904        | Transcribed sequences                                                                                                                                       |
| 1395707_at        | -1.31       | 1.06        | -1.24       | 0.043588        | 0.571976        | 0.167018        | Transcribed sequence with strong similarity to protein sp:P00722 (E. coli) BGAL_ECOLI Beta-galactosidase                                                    |
| 1380800_at        | -1.31       | 1.39        | 1.06        | 0.044827        | 0.005958        | 0.656435        | Transcribed sequences                                                                                                                                       |
| 1370163_at        | -1.32       | 2.03        | 1.54        | 0.008418        | 0.000037        | 0.002023        | ornithine decarboxylase 1                                                                                                                                   |
| 1373407_at        | -1.32       | 1.02        | -1.29       | 0.017381        | 0.805660        | 0.002727        | Transcribed sequences                                                                                                                                       |
| 1392447_at        | -1.32       | 1.24        | -1.06       | 0.023536        | 0.068761        | 0.610873        | Transcribed sequences                                                                                                                                       |
| 1393482_at        | -1.32       | 1.64        | 1.24        | 0.034356        | 0.005353        | 0.176539        | Transcribed sequences                                                                                                                                       |
| 1394968_at        | -1.32       | -1.13       | -1.50       | 0.037157        | 0.375181        | 0.036809        | Similar to PHD-like zinc finger protein (LOC363505), mRNA                                                                                                   |
| 1367759_at        | -1.33       | 1.11        | -1.20       | 0.013588        | 0.214608        | 0.073372        | H1 histone family, member 0                                                                                                                                 |
| 1387390_at        | -1.33       | -1.20       | -1.59       | 0.041035        | 0.155836        | 0.009081        | granzyme K                                                                                                                                                  |
| 1377768_at        | -1.34       | 1.01        | -1.32       | 0.033799        | 0.919178        | 0.028180        | vitamin A-deficient testicular protein 5                                                                                                                    |

|              |       |       |        |          |          |          |                                                                                                                                                                                                                                   |
|--------------|-------|-------|--------|----------|----------|----------|-----------------------------------------------------------------------------------------------------------------------------------------------------------------------------------------------------------------------------------|
| 1397528_at   | -1.34 | -1.10 | -1.48  | 0.036546 | 0.425735 | 0.013897 | Similar to splicing factor, arginine/serine-rich 2, interacting protein; SC35-interacting protein 1 (LOC312030), mRNA                                                                                                             |
| 1387074_at   | -1.34 | -1.14 | -1.53  | 0.049955 | 0.397725 | 0.133771 | regulator of G-protein signaling protein 2                                                                                                                                                                                        |
| 1393485_at   | -1.35 | 1.67  | 1.23   | 0.007134 | 0.001521 | 0.103821 | Transcribed sequences                                                                                                                                                                                                             |
| 1389045_at   | -1.35 | 1.33  | -1.01  | 0.018779 | 0.054177 | 0.945951 | Transcribed sequences                                                                                                                                                                                                             |
| 1368003_at   | -1.35 | -1.25 | -1.70  | 0.030600 | 0.216713 | 0.059724 | aldehyde dehydrogenase family 1, subfamily A2                                                                                                                                                                                     |
| 1379668_at   | -1.35 | 1.08  | -1.25  | 0.033118 | 0.354322 | 0.119877 | Similar to CG11306-PA (LOC361174), mRNA                                                                                                                                                                                           |
| 1385586_at   | -1.36 | 1.03  | -1.32  | 0.000112 | 0.724635 | 0.035235 | Transcribed sequences                                                                                                                                                                                                             |
| 1397686_at   | -1.36 | -1.16 | -1.57  | 0.026248 | 0.098134 | 0.006994 | Transcribed sequences                                                                                                                                                                                                             |
| 1389246_at   | -1.37 | 1.92  | 1.40   | 0.027713 | 0.000715 | 0.017520 | Transcribed sequence with moderate similarity to protein ref:NP_001488.2 (H.sapiens) UDP-Gal:betaGlcNAc beta 1,4-galactosyltransferase 1, membrane-bound form                                                                     |
| 1372873_at   | -1.37 | 1.03  | -1.32  | 0.035613 | 0.768886 | 0.010294 | Hypothetical LOC307390 (LOC307390), mRNA                                                                                                                                                                                          |
| 1388793_at   | -1.38 | 1.31  | -1.05  | 0.011781 | 0.063892 | 0.767053 | Similar to N-acetylglucosaminyl transferase component Gpi1 (LOC287159), mRNA                                                                                                                                                      |
| 1372176_at   | -1.38 | 1.43  | 1.03   | 0.032545 | 0.011018 | 0.801850 | protein kinase C, alpha                                                                                                                                                                                                           |
| 1389101_at   | -1.38 | -1.40 | -1.94  | 0.033775 | 0.051641 | 0.012396 | cyclin C                                                                                                                                                                                                                          |
| 1382104_at   | -1.39 | 1.21  | -1.15  | 0.037929 | 0.187066 | 0.108131 | Similar to putative WDC146 (LOC307524), mRNA                                                                                                                                                                                      |
| 1397029_at   | -1.39 | 1.21  | -1.16  | 0.038761 | 0.143341 | 0.316478 | Transcribed sequences                                                                                                                                                                                                             |
| 1372025_at   | -1.40 | 1.20  | -1.17  | 0.003353 | 0.209015 | 0.469337 | Transcribed sequences                                                                                                                                                                                                             |
| 1377411_at   | -1.40 | 1.24  | -1.13  | 0.033902 | 0.253515 | 0.597597 | Transcribed sequences                                                                                                                                                                                                             |
| 1393164_at   | -1.41 | -1.04 | -1.46  | 0.006700 | 0.853807 | 0.273590 | Similar to mitochondrial ribosomal protein S27; mitochondrial 28S ribosomal protein S27 (LOC361883), mRNA                                                                                                                         |
| 1387234_at   | -1.41 | 1.19  | -1.18  | 0.030396 | 0.136990 | 0.320342 | alpha-2-glycoprotein 1, zinc                                                                                                                                                                                                      |
| 1379295_at   | -1.42 | -1.08 | -1.53  | 0.028599 | 0.632766 | 0.053750 | Transcribed sequence with moderate similarity to protein ref:NP_113686.1 (H.sapiens) guanine nucleotide binding protein-gamma transducing activity polypeptide 2; gamma-T2 subunit; G protein cone gamma 8 subunit [Homo sapiens] |
| 1370160_at   | -1.43 | 1.65  | 1.16   | 0.043886 | 0.016068 | 0.153111 | cytoplasmic aminopeptidase P                                                                                                                                                                                                      |
| 1390042_at   | -1.45 | 1.97  | 1.36   | 0.031023 | 0.006672 | 0.078402 | Similar to 1110007F12Rik protein (LOC362334), mRNA                                                                                                                                                                                |
| 1395349_at   | -1.45 | 1.70  | 1.18   | 0.037616 | 0.012296 | 0.520314 | Transcribed sequences                                                                                                                                                                                                             |
| 1372248_at   | -1.46 | -1.94 | -2.83  | 0.037788 | 0.001987 | 0.002246 | Similar to Sestrin 1 (p53-regulated protein PA26) (LOC294518), mRNA                                                                                                                                                               |
| 1379418_at   | -1.48 | 1.10  | -1.35  | 0.006891 | 0.401710 | 0.058057 | Transcribed sequences                                                                                                                                                                                                             |
| 1379592_at   | -1.48 | 1.23  | -1.21  | 0.047814 | 0.301792 | 0.423305 | Similar to Calcium-binding mitochondrial carrier protein Aralar2 (Solute carrier family 25, member 13) (Citrin) (LOC296855), mRNA                                                                                                 |
| 1371776_at   | -1.48 | -1.37 | -2.04  | 0.049236 | 0.339359 | 0.169994 | phosphatidylinositol 3-kinase, regulatory subunit, polypeptide 1                                                                                                                                                                  |
| 1385017_at   | -1.50 | 1.44  | -1.05  | 0.029697 | 0.135366 | 0.912817 | Similar to Zinc finger protein 70 (Zinc finger protein N27C7-1) (LOC311303), mRNA                                                                                                                                                 |
| 1376484_at   | -1.52 | 1.72  | 1.13   | 0.005431 | 0.000754 | 0.500198 | Transcribed sequences                                                                                                                                                                                                             |
| 1392299_at   | -1.52 | 1.07  | -1.41  | 0.019570 | 0.614400 | 0.107575 | C-terminal PDZ domain ligand of neuronal nitric oxide synthase                                                                                                                                                                    |
| 1384131_at   | -1.55 | 1.29  | -1.20  | 0.044024 | 0.124015 | 0.302209 | Similar to ARL6IP2 (LOC298757), mRNA                                                                                                                                                                                              |
| 1397687_at   | -1.56 | 1.32  | -1.18  | 0.013440 | 0.050806 | 0.485139 | Transcribed sequences                                                                                                                                                                                                             |
| 1369639_at   | -1.62 | 1.60  | -1.01  | 0.017843 | 0.037970 | 0.973466 | gap junction membrane channel protein alpha 1                                                                                                                                                                                     |
| 1376467_at   | -1.62 | 1.33  | -1.22  | 0.025023 | 0.116420 | 0.088712 | Similar to leukemia associated gene protein (LOC301119), mRNA                                                                                                                                                                     |
| 1378199_at   | -1.67 | -2.33 | -3.88  | 0.037125 | 0.000668 | 0.000696 | Transcribed sequence with moderate similarity to protein sp:P00722 (E. coli) BGAL_ECOLI Beta-galactosidase                                                                                                                        |
| 1387876_at   | -1.68 | 1.49  | -1.12  | 0.045175 | 0.103465 | 0.559897 | signal transducer and activator of transcription 5B                                                                                                                                                                               |
| 1398393_at   | -1.69 | 1.30  | -1.29  | 0.016153 | 0.072280 | 0.342048 | Transcribed sequences                                                                                                                                                                                                             |
| 1397993_at   | -1.70 | 1.54  | -1.10  | 0.038348 | 0.120177 | 0.744743 | Transcribed sequences                                                                                                                                                                                                             |
| 1377297_at   | -1.71 | 1.21  | -1.41  | 0.012174 | 0.218315 | 0.097241 | Similar to HSPC182 protein (LOC298681), mRNA                                                                                                                                                                                      |
| 1393163_at   | -1.72 | 1.57  | -1.10  | 0.020595 | 0.016121 | 0.741572 | Transcribed sequences                                                                                                                                                                                                             |
| 1380564_at   | -1.75 | 1.30  | -1.34  | 0.013096 | 0.126405 | 0.172063 | LOC360567 (LOC360567), mRNA                                                                                                                                                                                                       |
| 1383457_at   | -1.77 | 1.78  | 1.01   | 0.004783 | 0.005447 | 0.967851 | Transcribed sequences                                                                                                                                                                                                             |
| 1374120_at   | -1.85 | 1.09  | -1.69  | 0.000148 | 0.366340 | 0.013336 | Transcribed sequences                                                                                                                                                                                                             |
| 1385205_at   | -1.87 | -5.66 | -10.56 | 0.017596 | 0.000000 | 0.000002 | Transcribed sequences                                                                                                                                                                                                             |
| 1381396_s_at | -1.92 | -1.20 | -2.31  | 0.003745 | 0.441159 | 0.065123 | Kruppel-like factor 15                                                                                                                                                                                                            |

<sup>a</sup>Probe Set ID, Affymetrix probe set number ([www.affymetrix.com](http://www.affymetrix.com)).

<sup>b</sup>FC, fold change.

<sup>c</sup>test, *t* test with  $P < 0.05$  considered statistically significant.

**Table S2.** Left ventricular weights and hemodynamic parameters in LIMP-2 KO and WT mice at baseline, and after 14 and 28 days of AngII treatment

|                             |                     | Baseline   | Day 14                  | Day 28                  |
|-----------------------------|---------------------|------------|-------------------------|-------------------------|
| LV mass index (mg/g) 14 d   | KO ( <i>n</i> = 4)  | 3.7 ± 0.1  | 4.0 ± 0.1 <sup>a</sup>  | na                      |
|                             | WT ( <i>n</i> = 5)  | 3.5 ± 0.2  | 4.6 ± 0.2               | na                      |
| LV mass index (mg/g) 28 d   | KO ( <i>n</i> = 11) | 3.9 ± 0.1  | na                      | 4.4 ± 0.2 <sup>b</sup>  |
|                             | WT ( <i>n</i> = 10) | 4.2 ± 0.2  | na                      | 5.5 ± 0.3 <sup>c</sup>  |
| Dfp/sys 14 d AngII (mmHg/s) | KO ( <i>n</i> = 4)  | 62.6 ± 6.5 | 60.9 ± 6.2 <sup>b</sup> | na                      |
|                             | WT ( <i>n</i> = 5)  | 61.1 ± 4.6 | 114.5 ± 10.1*           | na                      |
| Dfp/sys 28 d AngII (mmHg/s) | KO ( <i>n</i> = 11) | 72.5 ± 1.8 | na                      | 77.9 ± 6.4              |
|                             | WT ( <i>n</i> = 10) | 74.0 ± 2.1 | na                      | 87.6 ± 3.6 <sup>c</sup> |

Echocardiographic parameters in LIMP-2 KO and WT mice at baseline, and after 7, 10, 14, and 28 d of AngII treatment

|                         |                     | Baseline    | Day 7                      | Day 10                     | Day 14                     | Day 28                     |
|-------------------------|---------------------|-------------|----------------------------|----------------------------|----------------------------|----------------------------|
| IVSd <sup>d</sup> (cm)  | KO ( <i>n</i> = 11) | 0.10 ± 0.00 | 0.09 ± 0.00 <sup>a,c</sup> | 0.09 ± 0.01                | 0.10 ± 0.01 <sup>a</sup>   | 0.10 ± 0.01 <sup>b</sup>   |
|                         | WT ( <i>n</i> = 10) | 0.10 ± 0.01 | 0.10 ± 0.00                | 0.11 ± 0.00                | 0.13 ± 0.01                | 0.13 ± 0.00 <sup>c</sup>   |
| LVIDd <sup>d</sup> (cm) | KO ( <i>n</i> = 11) | 0.34 ± 0.01 | 0.35 ± 0.01 <sup>a</sup>   | 0.37 ± 0.00 <sup>a,c</sup> | 0.38 ± 0.01 <sup>b,c</sup> | 0.38 ± 0.01 <sup>b,c</sup> |
|                         | WT ( <i>n</i> = 10) | 0.34 ± 0.01 | 0.31 ± 0.01                | 0.32 ± 0.01                | 0.33 ± 0.02                | 0.33 ± 0.01                |
| LVPWd <sup>d</sup> (cm) | KO ( <i>n</i> = 11) | 0.10 ± 0.01 | 0.09 ± 0.00 <sup>a</sup>   | 0.10 ± 0.00 <sup>a</sup>   | 0.09 ± 0.01 <sup>b</sup>   | 0.09 ± 0.00 <sup>b</sup>   |
|                         | WT ( <i>n</i> = 10) | 0.10 ± 0.00 | 0.13 ± 0.01                | 0.16 ± 0.01                | 0.15 ± 0.01                | 0.15 ± 0.01 <sup>c</sup>   |
| LVAd <sup>e</sup> (cm)  | KO ( <i>n</i> = 11) | 0.21 ± 0.01 | na                         | na                         | 0.27 ± 0.01 <sup>b,c</sup> | 0.28 ± 0.02 <sup>a,c</sup> |
|                         | WT ( <i>n</i> = 10) | 0.21 ± 0.01 | na                         | na                         | 0.23 ± 0.01                | 0.22 ± 0.00                |
| LVLd <sup>e</sup> (cm)  | KO ( <i>n</i> = 11) | 0.73 ± 0.01 | na                         | na                         | 0.85 ± 0.02 <sup>a,c</sup> | 0.84 ± 0.03 <sup>a,c</sup> |
|                         | WT ( <i>n</i> = 10) | 0.73 ± 0.01 | na                         | na                         | 0.79 ± 0.02 <sup>c</sup>   | 0.79 ± 0.02 <sup>c</sup>   |
| FS <sup>d</sup> (%)     | KO ( <i>n</i> = 11) | 28.7 ± 1.9  | 27.4 ± 2.6                 | 27.6 ± 2.3                 | 20.1 ± 3.1                 | 22.2 ± 3.0                 |
|                         | WT ( <i>n</i> = 10) | 27.4 ± 2.1  | 30.5 ± 1.7                 | 31.1 ± 2.9                 | 25.8 ± 1.9                 | 25.5 ± 2.9                 |

Averages ± SEM

<sup>a</sup>P < 0.05 versus age-matched WT.

<sup>b</sup>P < 0.001 versus age-matched WT.

<sup>c</sup>P < 0.005 versus baseline KO or WT.

<sup>d</sup>Measured from short axis: IVSd, interventricular septum in diastole; LVIDd, left ventricular inner diameter in diastole; LVPWd, left ventricular posterior wall thickness in diastole; FS (%), percentage of fractional shortening.

<sup>e</sup>Measured from long axis: LVAd, left ventricular area in diastole; LVLd, left ventricular length in diastole.
